# Supplementary material for: Changes in physical activity, diet, and body weight across the education and employment transitions of early adulthood: A systematic review and meta‐analysis
Source: PubMed Central journal article supplement (PMC7079102; doi:10.1111/obr.12962), 2020-01-19
Supplement: OBR-21-e12962-s001.pdf [file OBR-21-e12962-s001.pdf]

## SUPPORTING INFORMATION

### Changes in physical activity, diet and body weight across the education and employment transitions of early adulthood: A systematic review and meta-analysis.

Eleanor M. Winpenny, Miranda Smith, Tarra Penney, Campbell Foubister, Justin M. Guagliano, Rebecca Love, Chloe Clifford Astbury, Esther M. F. van Sluijs, Kirsten Corder.

**Address for correspondence:** Eleanor Winpenny, MRC Epidemiology Unit, University of Cambridge School of Clinical Medicine, Box 285, Institute of Metabolic Science, Cambridge Biomedical Campus, Cambridge, CB2 0QQ, U.K. Telephone: +44 (0)1223 769150 Fax: +44 (0)1223 330316 Email: [ew470@cam.ac.uk](mailto:ew470@cam.ac.uk)

Table S1: Search terms.

|   |                            |                                                                                                                                                                                                                                                                                                                                                                                                                                                                                                                                                                                                                                                                                                                                                                                                                                                                                                            |
|---|----------------------------|------------------------------------------------------------------------------------------------------------------------------------------------------------------------------------------------------------------------------------------------------------------------------------------------------------------------------------------------------------------------------------------------------------------------------------------------------------------------------------------------------------------------------------------------------------------------------------------------------------------------------------------------------------------------------------------------------------------------------------------------------------------------------------------------------------------------------------------------------------------------------------------------------------|
| 1 | Diet outcomes              | <p>food*[Title/Abstract] OR beverage*[Title/Abstract] OR nutrient*[Title/Abstract] OR macronutrient*[Title/Abstract] OR "energy intake"[Title/Abstract] OR diet[Title/Abstract] OR diets[Title/Abstract] OR "dietary"[Title/Abstract] OR nutrition[Title/Abstract] OR nutritional[Title/Abstract] OR fruit[Title/Abstract] OR vegetable[Title/Abstract] OR fruits[Title/Abstract] OR vegetables[Title/Abstract] OR dairy[Title/Abstract] OR grain*[Title/Abstract] OR meat[Title/Abstract] OR cereal*[Title/Abstract] OR "soft drink*" [Title/Abstract] OR soda[Title/Abstract] OR SSB[Title/Abstract] OR SSBs[Title/Abstract] OR salt[Title/Abstract] OR sugar*[Title/Abstract] OR "Food"[Mesh] OR "Beverages"[Mesh] OR diet[Mesh] OR "Nutrition Surveys"[Mesh] OR "Diet Records"[Mesh] OR "Dietary Fats"[Mesh] OR "Dietary Proteins"[Mesh] OR "Dietary Carbohydrates "[Mesh] OR "Healthy Diet"[Mesh]</p> |
|   | Eating Behaviour outcomes  | <p>OR cook*[Title/Abstract] OR "food preparation"[Title/Abstract] OR "eating behaviour"[Title/Abstract] OR "eating behavior"[Title/Abstract] OR meal*[Title/Abstract] OR snack*[Title/Abstract] OR "dining out"[Title/Abstract] OR breakfast[Title/Abstract] OR dinner[Title/Abstract] OR lunch[Title/Abstract] OR supper[Title/Abstract] OR "fast food"[Title/Abstract] OR "fast-food"[Title/Abstract] OR restaurant[Title/Abstract] OR "take-away"[Title/Abstract] OR takeaway[Title/Abstract] OR "eating out"[Title/Abstract] OR "away from home"[Title/Abstract] OR "out of home"[Title/Abstract] OR "away-from-home"[Title/Abstract] OR "out-of-home"[Title/Abstract] OR "home-cook*" [Title/Abstract] OR "home prepar*" [Title/Abstract] OR "home cook*" [Title/Abstract] OR "home-prepar*" [Title/Abstract]</p>                                                                                     |
|   | Physical activity outcomes | <p>OR "physical activity"[Title/Abstract] OR "physical activities"[Title/Abstract] OR "physically active"[Title/Abstract] OR "active transport"[Title/Abstract] OR "active travel"[Title/Abstract] OR exercise*[Title/Abstract] OR cycle[Title/Abstract] OR cycling[Title/Abstract] OR walk*[Title/Abstract] OR sport*[Title/Abstract] OR "energy expenditure"[Title/Abstract] OR MVPA[Title/Abstract] OR "vigorous activity"[Title/Abstract] OR VPA[Title/Abstract] OR "moderate activity" [Title/Abstract] OR "light activity"[Title/Abstract] OR MPA[Title/Abstract] OR "intensity activity"[Title/Abstract] OR "LPA"[Title/Abstract] OR "strenuous activity"[Title/Abstract] OR "Exercise"[MeSH] OR "Sports"[Mesh]</p>                                                                                                                                                                                 |

|   |                    |                                                                                                                                                                                                                                                                                                                                                                                                                                                                                                                                                                                                                                                                                                                                                                                                                                                                                                                                                                                                                                                                                                                                                                                                                                                                                                                                                                                                                                                                                                                                       |
|---|--------------------|---------------------------------------------------------------------------------------------------------------------------------------------------------------------------------------------------------------------------------------------------------------------------------------------------------------------------------------------------------------------------------------------------------------------------------------------------------------------------------------------------------------------------------------------------------------------------------------------------------------------------------------------------------------------------------------------------------------------------------------------------------------------------------------------------------------------------------------------------------------------------------------------------------------------------------------------------------------------------------------------------------------------------------------------------------------------------------------------------------------------------------------------------------------------------------------------------------------------------------------------------------------------------------------------------------------------------------------------------------------------------------------------------------------------------------------------------------------------------------------------------------------------------------------|
|   | Adiposity outcomes | OR "BMI"[Title/Abstract] OR "weight gain"[Title/Abstract] OR "weight loss"[Title/Abstract] OR "body weight"[Title/Abstract] OR "body mass"[Title/Abstract] OR "change in weight"[Title/Abstract] OR " weight change"[Title/Abstract] OR "waist circumference"[Title/Abstract] OR anthropometry[Title/Abstract] OR anthropometric[Title/Abstract] OR "fat mass"[Title/Abstract] OR "lean mass"[Title/Abstract] OR "body composition"[Title/Abstract] OR skinfold[Title/Abstract] OR overweight[Title/Abstract] OR obesity[Title/Abstract] OR adiposity[Title/Abstract]                                                                                                                                                                                                                                                                                                                                                                                                                                                                                                                                                                                                                                                                                                                                                                                                                                                                                                                                                                 |
| 2 | Longitudinal       | longitudinal[Title/Abstract] OR cohort[Title/Abstract] OR prospective[Title/Abstract] OR "follow-up*"[Title/Abstract] OR "follow up"[Title/Abstract] OR "Follow-Up Studies"[Mesh] OR "Prospective Studies"[Mesh] OR "Longitudinal Studies"[Mesh] OR "Cohort Studies"[Mesh] OR "life-course"[Title/Abstract] OR "life course"[Title/Abstract] OR "repeated measure"[Title/Abstract] OR "repeated-measure"[Title/Abstract]                                                                                                                                                                                                                                                                                                                                                                                                                                                                                                                                                                                                                                                                                                                                                                                                                                                                                                                                                                                                                                                                                                              |
| 3 | Transition         | "Further education"[Title/Abstract] OR "Higher education"[Title/Abstract] OR "entering education"[Title/Abstract] OR "leaving education"[Title/Abstract] OR "leaving school"[Title/Abstract] OR "school leaver*"[Title/Abstract] OR college[Title/Abstract] OR university[Title/Abstract] OR freshman[Title/Abstract] OR freshmen[Title/Abstract] OR Graduate[Title/Abstract] OR Undergrad*[Title/Abstract] OR employment[Title/Abstract] OR "first job"[Title/Abstract] OR "starting work" [Title/Abstract] OR "moving house"[Title/Abstract] OR "change of address"[Title/Abstract] OR "residential relocation"[Title/Abstract] OR "residential mobility"[Title/Abstract] OR "residential instability"[Title/Abstract] OR "geographic* mobility"[Title/Abstract] OR "geographic relocation"[Title/Abstract] OR "residential relocation"[Title/Abstract] OR "residential stability"[Title/Abstract] OR<br><br>OR "living arrangements"[Title/Abstract] OR cohabit*[Title/Abstract] OR marriage[Title/Abstract] OR "marital status" [Title/Abstract] OR parity[Title/Abstract] OR parous[Title/Abstract] OR childbearing[Title/Abstract] OR postpartum[Title/Abstract] OR "post-partum"[Title/Abstract] OR "first child*"[Title/Abstract] OR "having children"[Title/Abstract] OR "having a child"[Title/Abstract] OR trajector*[Title/Abstract] OR "transition*"[Title/Abstract] OR "life transition"[Title/Abstract] OR "life events"[Title/Abstract] OR "Life Change Events"[Mesh] OR "Marital Status"[Mesh] OR "Employment"[Mesh] |
| 4 | Additional filters | English[lang]<br><br>NOT Review[ptyp]<br><br>NOT Neoplasm[Mesh]<br><br>Humans (filter)                                                                                                                                                                                                                                                                                                                                                                                                                                                                                                                                                                                                                                                                                                                                                                                                                                                                                                                                                                                                                                                                                                                                                                                                                                                                                                                                                                                                                                                |
| 5 |                    | 1 AND 2 AND 3 AND 4                                                                                                                                                                                                                                                                                                                                                                                                                                                                                                                                                                                                                                                                                                                                                                                                                                                                                                                                                                                                                                                                                                                                                                                                                                                                                                                                                                                                                                                                                                                   |

Note. The search strategy was originally designed for PubMed and then adapted as necessary for the other databases.

Table S2: Quality assessment tool for longitudinal observational studies of diet.

| Item                                                                                                                                | Physical activity/sedentary behaviour                                                                                                                                                                                                                                                                                                                                                                                                                                    | Diet                                                                                                                                                                | Anthropometry (Body weight, BMI, waist circumference)                                                                                                          |
|-------------------------------------------------------------------------------------------------------------------------------------|--------------------------------------------------------------------------------------------------------------------------------------------------------------------------------------------------------------------------------------------------------------------------------------------------------------------------------------------------------------------------------------------------------------------------------------------------------------------------|---------------------------------------------------------------------------------------------------------------------------------------------------------------------|----------------------------------------------------------------------------------------------------------------------------------------------------------------|
| A. Study population and participation (baseline): the study sample represents the population of interest on key characteristics.    |                                                                                                                                                                                                                                                                                                                                                                                                                                                                          |                                                                                                                                                                     |                                                                                                                                                                |
| 1. Adequate description of sampling frame, recruitment methods, period of recruitment and place of recruitment                      | Item was scored positively if three of the following points were mentioned: (i) description of how participants were sampled (e.g. sourced from the electoral roll, all schools in state or country, or from a larger study); (ii) description of specific methods used for recruitment (e.g. newsletters, phone call, advertising); (iii) period of recruitment provided (e.g. March 2010); or (iv) place of recruitment detailed (e.g. Wollongong, Australia, Glasgow) |                                                                                                                                                                     |                                                                                                                                                                |
| 2. Adequate description of baseline study sample for key characteristics                                                            | Item was scored positively if all three of the following points were mentioned: (i) number of participants; (ii) age (mean age or % at each age); and (iii) gender                                                                                                                                                                                                                                                                                                       |                                                                                                                                                                     |                                                                                                                                                                |
| B. Study attrition: loss to follow-up not associated with key characteristics (i.e. the study data adequately represent the sample) |                                                                                                                                                                                                                                                                                                                                                                                                                                                                          |                                                                                                                                                                     |                                                                                                                                                                |
| 3. Provision of the exact number of participants at each follow-up measurement(s)                                                   | Item was scored positively if the number or percentage of participants at each time point was detailed                                                                                                                                                                                                                                                                                                                                                                   |                                                                                                                                                                     |                                                                                                                                                                |
| 4. Provision of exact information on follow-up duration                                                                             | Item was scored positively if detail about the follow-up duration (e.g. 1 year, 6 years) was provided                                                                                                                                                                                                                                                                                                                                                                    |                                                                                                                                                                     |                                                                                                                                                                |
| 5. Presentation of data showing non-selective non-response during follow-up measurement(s)                                          | Item was scored positively if those who dropped out of the study were similar on key characteristics to those who were retained at follow-up.                                                                                                                                                                                                                                                                                                                            |                                                                                                                                                                     |                                                                                                                                                                |
| C. Data collection                                                                                                                  |                                                                                                                                                                                                                                                                                                                                                                                                                                                                          |                                                                                                                                                                     |                                                                                                                                                                |
| 6. Adequate description of methods of data collection                                                                               | Objective measures: Item was scored positively if at least three of the following points were mentioned: (1) type of instrument; (2) length of epoch; (3) number of days worn; (4) number of hours/day worn; (5) number of                                                                                                                                                                                                                                               | Comprehensive measurement of diet: item was scored positively if both of the following points were mentioned: (i) type of instrument; (ii) number of days measured. | Objective measurement: item was scored positively if both of the following points were mentioned: (i) type of instrument; (ii) who performed the measurements. |

|                                                                               |                                                                                                                                                                                                           |                                                                                                                                                                                                  |                                                                         |
|-------------------------------------------------------------------------------|-----------------------------------------------------------------------------------------------------------------------------------------------------------------------------------------------------------|--------------------------------------------------------------------------------------------------------------------------------------------------------------------------------------------------|-------------------------------------------------------------------------|
|                                                                               | minutes monitored;<br>(6) description of monitor placement;<br>and (7) data reduction methods described                                                                                                   |                                                                                                                                                                                                  |                                                                         |
|                                                                               | Subjective measures: Item was scored positively if the instrument was described including the number of items.                                                                                            | Questionnaire measures: Item was scored <i>positively</i> if the questions used and response options were described in full.                                                                     | Self-reported: N/A                                                      |
| 7. Adequate measurement method                                                | Item was scored positively if physical activity was measured objectively and/or sedentary behaviour was measured by proxy report, including provision of validity and/or reliability data and a reference | Item was scored positively if a comprehensive diet measurement instrument (e.g. diet record, 24-hr recall, FFQ) was used. 0 points scored for any other method e.g. questions in a questionnaire | Item was scored positively if objective measurement, 0 if self-reported |
| 8. Data processing                                                            | Item was scored positively if the cut points were referenced (subjective measures were given an N/A, which meant that those studies were scored using a total of 9 rather than 10)                        | Item was scored positively if a description of adjustment for mis-reporting was included.                                                                                                        | N/A                                                                     |
| D. Data analyses                                                              |                                                                                                                                                                                                           |                                                                                                                                                                                                  |                                                                         |
| 9. Adequate description of analysed sample (inclusion and exclusion criteria) | Item was scored positively if details of the samples included in the final analysis were included (e.g. all participants; participants with complete data)                                                |                                                                                                                                                                                                  |                                                                         |
| 10. The analysed sample was at least medium in size                           | Item was scored <i>positively</i> if analysed sample was $\geq 250$ participants                                                                                                                          |                                                                                                                                                                                                  |                                                                         |

When multiple outcomes were assessed by a single paper, a positive score was given if any of the outcomes scored positively.

Scores for each item were summed and a paper was deemed to have high methodologic quality if it scored  $\geq 7$ .
